# Supplementary material for: Correction: A reduced radial potential energy function for the halogen bond and the hydrogen bond in complexes B⋯XY and B⋯HX, where X and Y are halogen atoms
Source: Royal Society of Chemistry journal article supplement (doi:10.1039/c4cp90149e), 2014-01-01
Supplement: c4cp90149e1.pdf [file c4cp90149e1.pdf]

Table 1'. Some observed and calculated properties of halogen-bonded complexes B...X<sub>2</sub> involving non-polar dihalogen molecules X<sub>2</sub> (including CABS singles in calculating BSSE corrections for B...Br<sub>2</sub>)<sup>a</sup>

| Lewis base B                  | Dihalogen molecules X <sub>2</sub>          |      |                                             |                                  |                                             |      |                                             |                                  |                                             |      |                                             |                                  |
|-------------------------------|---------------------------------------------|------|---------------------------------------------|----------------------------------|---------------------------------------------|------|---------------------------------------------|----------------------------------|---------------------------------------------|------|---------------------------------------------|----------------------------------|
|                               | Difluorine F <sub>2</sub>                   |      |                                             |                                  | Dichlorine Cl <sub>2</sub>                  |      |                                             |                                  | Dibromine Br <sub>2</sub>                   |      |                                             |                                  |
|                               | <i>k</i> <sub>σ</sub> /(N m <sup>-1</sup> ) | Ref. | <i>D</i> <sub>σ</sub> /kJ mol <sup>-1</sup> | <i>r</i> (Z...X <sub>i</sub> )/Å | <i>k</i> <sub>σ</sub> /(N m <sup>-1</sup> ) | Ref. | <i>D</i> <sub>σ</sub> /kJ mol <sup>-1</sup> | <i>r</i> (Z...X <sub>i</sub> )/Å | <i>k</i> <sub>σ</sub> /(N m <sup>-1</sup> ) | Ref. | <i>D</i> <sub>σ</sub> /kJ mol <sup>-1</sup> | <i>r</i> (Z...X <sub>i</sub> )/Å |
| OC                            | -                                           | -    | -                                           | -                                | 3.68(1)                                     | 12   | 5.19                                        | 3.145                            | 5.03(2)                                     | 20   | 7.50                                        | 3.111                            |
| C <sub>2</sub> H <sub>2</sub> | -                                           | -    | -                                           | -                                | 5.61(1)                                     | 13   | 7.45                                        | 3.146                            | 7.80(3)                                     | 21   | 11.05                                       | 3.106                            |
| C <sub>2</sub> H <sub>4</sub> | -                                           | -    | -                                           | -                                | 5.88(2)                                     | 14   | 8.61                                        | 3.092                            | 8.8(2)                                      | 22   | 13.49                                       | 3.004                            |
| H <sub>2</sub> S              | 2.34(1)                                     | 7    | 3.43                                        | 3.143                            | 6.23(2)                                     | 15   | 8.53                                        | 3.246                            | 9.8(2)                                      | 23   | 13.83                                       | 3.131                            |
| H <sub>3</sub> P              | -                                           | -    | -                                           | -                                | 5.58(2)                                     | 16   | 8.34                                        | 3.222                            | 9.79(3)                                     | 24   | 15.35                                       | 3.013                            |
| HCN                           | 2.62(1)                                     | 8    | 4.15                                        | 2.811                            | 6.55(2)                                     | 17   | 9.71                                        | 2.921                            | -                                           | -    | -                                           | -                                |
| H <sub>2</sub> O              | 3.66(1)                                     | 9,10 | 4.63                                        | 2.696                            | 7.98(3)                                     | 18   | 10.66                                       | 2.808                            | 9.9(2)                                      | 25   | 14.96                                       | 2.804                            |
| H <sub>3</sub> N              | 4.61(1)                                     | 11   | 6.59                                        | 2.679                            | 12.73(2)                                    | 19   | 17.85                                       | 2.681                            | 18.5(4)                                     | 26   | 28.17                                       | 2.601                            |

<sup>a</sup>Values of *k*<sub>σ</sub> are either taken directly from the reference having the number indicated in columns 3,7 or 11, as appropriate, or are recalculated from the centrifugal distortion constant *D*<sub>*J*</sub> or *Δ*<sub>*J*</sub> given therein by using eq.(1) or (2). The quoted error is that transmitted by the error in the distortion constant. *D*<sub>σ</sub> and *r*(Z...X<sub>i</sub>) are equilibrium values calculated *ab initio* at the CCSD(T)(F12c)/cc-pVDZ-F12 level of theory (see text). *r*(Z...X<sub>i</sub>) is the distance from the acceptor atom/centre Z in the Lewis base B to the inner halogen atom X<sub>i</sub>

Table 2'. Some observed and calculated properties of halogen-bonded complexes B $\cdots$ XY involving polar dihalogen molecules XY (including CABS singles in calculating BSSE corrections for Br- and I- containing species)<sup>a</sup>

| Lewis base B                  | Dihalogen molecules XY         |      |                                 |                                        |                                |      |                                 |                                        |                                |      |                                 |                                        |
|-------------------------------|--------------------------------|------|---------------------------------|----------------------------------------|--------------------------------|------|---------------------------------|----------------------------------------|--------------------------------|------|---------------------------------|----------------------------------------|
|                               | Chlorine monofluoride ClF      |      |                                 |                                        | Bromine monochloride BrCl      |      |                                 |                                        | Iodine monochloride ICl        |      |                                 |                                        |
|                               | $k_{\sigma}/(\text{N m}^{-1})$ | Ref. | $D_{\sigma}/\text{kJ mol}^{-1}$ | $r(\text{Z}\cdots\text{X})/\text{\AA}$ | $k_{\sigma}/(\text{N m}^{-1})$ | Ref. | $D_{\sigma}/\text{kJ mol}^{-1}$ | $r(\text{Z}\cdots\text{X})/\text{\AA}$ | $k_{\sigma}/(\text{N m}^{-1})$ | Ref. | $D_{\sigma}/\text{kJ mol}^{-1}$ | $r(\text{Z}\cdots\text{X})/\text{\AA}$ |
| N <sub>2</sub>                | 5.00(3)                        | 27   | 6.28                            | 2.918                                  | 4.40(2)                        | 35   | 5.75                            | 3.106                                  | 5.37(2)                        | 44   | 7.22                            | 3.187                                  |
| OC                            | 7.04(2)                        | 28   | 10.56                           | 2.772                                  | 6.27(5)                        | 36   | 9.38                            | 3.006                                  | 8.00(3)                        | 45   | 12.99                           | 3.003                                  |
| C <sub>2</sub> H <sub>2</sub> | 10.01(2)                       | 29   | 13.68                           | 2.859                                  | 9.48(6)                        | 37   | 13.16                           | 3.038                                  | 12.12(8)                       | 46   | 17.52                           | 3.112                                  |
| C <sub>2</sub> H <sub>4</sub> | 11.01(3)                       | 30   | 17.01                           | 2.730                                  | 10.54(1)                       | 38   | 16.11                           | 2.927                                  | 14.0(1)                        | 47   | 21.99                           | 2.958                                  |
| H <sub>2</sub> S              | 13.40(3)                       | 31   | 18.13                           | 2.835                                  | 12.07(10)                      | 39   | 16.71                           | 3.057                                  | 16.55(5)                       | 48   | 22.73                           | 3.120                                  |
| H <sub>3</sub> P              | -                              | -    | -                               | -                                      | 11.56(7)                       | 40   | 19.45                           | 2.878                                  | 20.7(1)                        | 49   | 29.13                           | 2.898                                  |
| HCN                           | 12.33(5)                       | 32   | 18.42                           | 2.639                                  | 11.09(10)                      | 41   | 17.13                           | 2.826                                  | 14.5(1)                        | 50   | 24.08                           | 2.840                                  |
| H <sub>2</sub> O              | 14.24(3)                       | 33   | 20.14                           | 2.554                                  | 12.08(2)                       | 42   | 18.29                           | 2.735                                  | 15.9(2)                        | 51   | 24.93                           | 2.776                                  |
| H <sub>3</sub> N              | 34.3(5)                        | 34   | 40.43                           | 2.304                                  | 26.7(3)                        | 43   | 34.58                           | 2.532                                  | 30.4(3)                        | 52   | 47.40                           | 2.599                                  |

<sup>a</sup>Values of  $k_{\sigma}$  are either taken directly from the reference having the number indicated in columns 3, 7 or 11, as appropriate, or are recalculated from the centrifugal distortion constant  $D_J$  or  $\Delta_J$  given therein by using eq.(1) or (2). The quoted error is that transmitted by the error in the distortion constant.  $D_{\sigma}$  and  $r(\text{Z}\cdots\text{X}_i)$  are equilibrium values calculated *ab initio* at the CCSD(T)(F12c)/cc-pVDZ-F12 level of theory (see text).  $r(\text{Z}\cdots\text{X})$  is the distance from the acceptor atom/centre Z in the Lewis base B to the inner halogen atom X.

Table 3'. Some observed and calculated properties of hydrogen-bonded complexes B...HX (including CABS singles in calculating BSSE corrections for Br and I containing species)<sup>a</sup>

| Lewis base B                  | Hydrogen halide molecules HX   |       |                                 |                                        |                                |       |                                 |                                        |
|-------------------------------|--------------------------------|-------|---------------------------------|----------------------------------------|--------------------------------|-------|---------------------------------|----------------------------------------|
|                               | Hydrogen fluoride HF           |       |                                 |                                        | Hydrogen chloride HCl          |       |                                 |                                        |
|                               | $k_{\sigma}/(\text{N m}^{-1})$ | Ref.  | $D_{\sigma}/\text{kJ mol}^{-1}$ | $r(\text{Z}\cdots\text{H})/\text{\AA}$ | $k_{\sigma}/(\text{N m}^{-1})$ | Ref.  | $D_{\sigma}/\text{kJ mol}^{-1}$ | $r(\text{Z}\cdots\text{H})/\text{\AA}$ |
| N <sub>2</sub>                | 5.13(3)                        | 53    | 9.26                            | 2.099                                  | 2.55(1)                        | 62,63 | 5.12                            | 2.400                                  |
| OC                            | 8.48(9)                        | 54    | 14.21                           | 2.103                                  | 3.88(1)                        | 64    | 7.78                            | 2.393                                  |
| C <sub>2</sub> H <sub>2</sub> | -                              | -     | -                               | -                                      | 6.4(3)                         | 65    | 11.03                           | 2.378                                  |
| C <sub>2</sub> H <sub>4</sub> | -                              | -     | -                               | -                                      | 5.88(16)                       | 66    | 11.32                           | 2.396                                  |
| H <sub>2</sub> S              | 12.0(2)                        | 55,56 | 20.36                           | 2.284                                  | 6.81(1)                        | 67    | 12.73                           | 2.480                                  |
| H <sub>3</sub> P              | 10.94(4)                       | 57    | 19.38                           | 2.354                                  | 6.01(2)                        | 68    | 11.89                           | 2.569                                  |
| HCN                           | 18.26(5)                       | 58    | 30.33                           | 1.859                                  | 9.25(4)                        | 69    | 18.33                           | 2.092                                  |
| H <sub>2</sub> O              | 24.51(2)                       | 59,60 | 35.34                           | 1.721                                  | 12.72(12)                      | 70    | 21.34                           | 1.912                                  |
| H <sub>3</sub> N              | 32.8                           | 61    | 50.98                           | 1.703                                  | 18.2(3)                        | 71    | 32.72                           | 1.820                                  |
|                               | Hydrogen bromide HBr           |       |                                 |                                        | Hydrogen iodide HI             |       |                                 |                                        |
|                               | $k_{\sigma}/(\text{N m}^{-1})$ | Ref.  | $D_{\sigma}/\text{kJ mol}^{-1}$ | $r(\text{Z}\cdots\text{H})/\text{\AA}$ | $k_{\sigma}/(\text{N m}^{-1})$ | Ref.  | $D_{\sigma}/\text{kJ mol}^{-1}$ | $r(\text{Z}\cdots\text{H})/\text{\AA}$ |
| N <sub>2</sub>                | 1.92(1)                        | 72    | 4.19                            | 2.503                                  | -                              | -     | -                               | -                                      |
| OC                            | 2.99(1)                        | 73    | 6.33                            | 2.489                                  | 1.713(1)                       | 81    | 4.38                            | 2.675                                  |
| C <sub>2</sub> H <sub>2</sub> | 5.39(2)                        | 74    | 9.54                            | 2.440                                  | -                              | -     | -                               | -                                      |
| C <sub>2</sub> H <sub>4</sub> | 5.21(2)                        | 75    | 9.94                            | 2.456                                  | -                              | -     | -                               | -                                      |
| H <sub>2</sub> S              | 5.86(2)                        | 76    | 11.12                           | 2.526                                  | 4.02(1)                        | 82    | 8.04                            | 2.670                                  |
| H <sub>3</sub> P              | 5.05(1)                        | 77    | 10.35                           | 2.618                                  | 3.409(2)                       | 83    | 7.48                            | 2.778                                  |
| HCN                           | 7.64(2)                        | 78    | 15.28                           | 2.161                                  | 4.44(1)                        | 84    | 10.93                           | 2.319                                  |
| H <sub>2</sub> O              | 10.06(15)                      | 79    | 17.85                           | 1.969                                  | 6.64(1)                        | 85    | 12.52                           | 2.117                                  |
| H <sub>3</sub> N              | 13.4(3)                        | 80    | 29.05                           | 1.800                                  | 7.18(6)                        | 86    | 20.45                           | 1.926                                  |

<sup>a</sup>Values of  $k_{\sigma}$  are either taken directly from the reference having the number indicated in columns 3 or 7, as appropriate, or are recalculated from the centrifugal distortion constant  $D_J$  or  $A_J$  given therein by using eq.(1) or (2). The quoted error is that transmitted by the error in the distortion constant.  $D_{\sigma}$  and  $r(\text{Z}\cdots\text{H})$  are equilibrium values calculated *ab initio* at the CCSD(T)(F12c)/cc-pVDZ-F12 level of theory (see text).  $r(\text{Z}\cdots\text{H})$  is the distance from the acceptor atom/centre Z of the Lewis base B to the hydrogen atom H.
